# Supplementary material
Source: Springer Nature journal article supplement (https://www.springermedizin.de/resource/supplementary/13027_2012_429_MOESM1_ESM.pdf/25657122)
Supplement: MOESM1 [file 25657122]

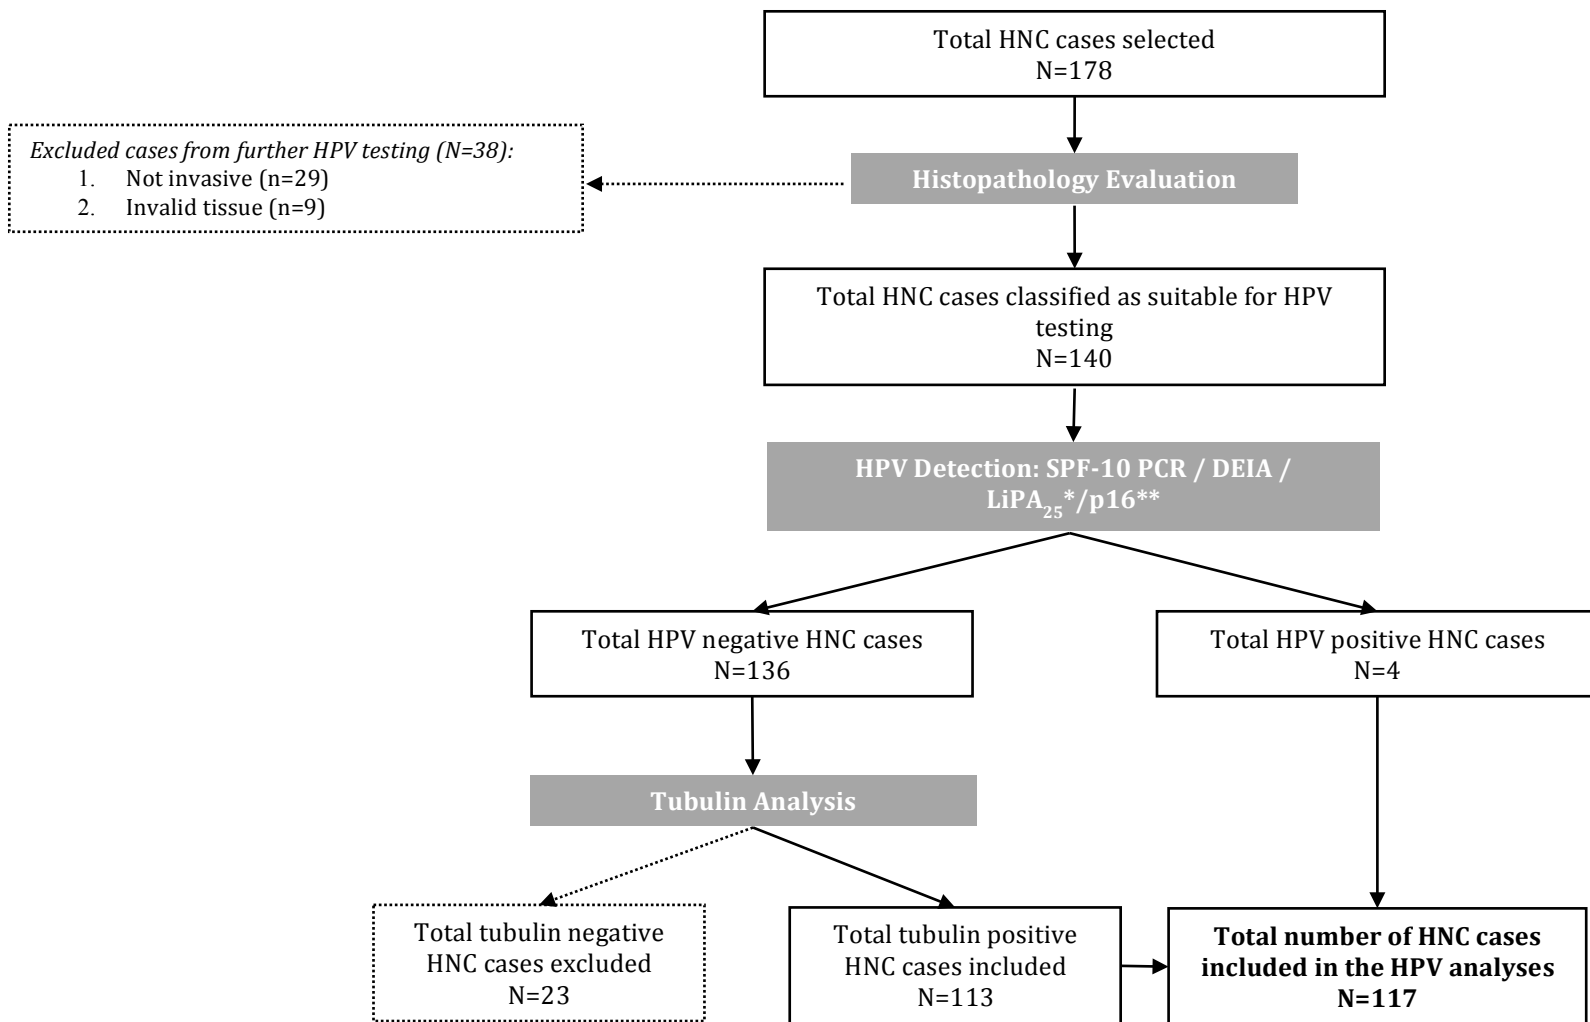

HNC: Invasive Head and Neck Cancer; \*LiPA<sub>25</sub> performed only in DEIA positive cases; \*\*p16 performed only in DEIA positive cases
